# Supplementary material
Source: PubMed Central journal article supplement (PMC11559162)
Supplement: NIHMS2031447-supplement-Supplementary_Table_1.pdf [file NIHMS2031447-supplement-Supplementary_Table_1.pdf]

| Mean Rate | NIH INSTITUTION                          | INSTITUTION                                                    |       | 2009   | 2010   | 2011   | 2012   | 2013   | 2014   | 2015   | 2016   | 2017   | 2018   | 2019   | 2020         | 2021   | 2022   | 2023   | 2024   | 2025         |
|-----------|------------------------------------------|----------------------------------------------------------------|-------|--------|--------|--------|--------|--------|--------|--------|--------|--------|--------|--------|--------------|--------|--------|--------|--------|--------------|
| 47.14%    | UNIVERSITY OF ALABAMA AT BIRMINGHAM      | Alabama - Birmingham, University of                            | RATES | 46.00% | 46.50% | 46.50% | 46.50% | 46.50% | 47%    | 47.00% | 47.00% | 48.50% | 48.50% | 48.50% | 48.50%       | 48.50% | 48.50% |        |        |              |
| 66.78%    | ALBERT EINSTEIN COLLEGE OF MEDICINE      | Albert Einstein College of Medicine                            | RATES |        |        | 66.00% | 66.00% | 67.00% | 67.00% | 67.00% | 67.00% | 67.00% | 67.00% | 67.00% | 67.50%       | 68.00% | 68.00% |        | 68.00% |              |
| 54.18%    | ARIZONA STATE UNIVERSITY-TEMPE CAMPUS    | Arizona State University                                       | RATES | 52.50% | 52.50% | 52.50% | 54.00% | 54.00% | 54.50% | 54.50% | 54.50% | 54.50% | 54.50% | 56.00% | 56.50%       | 57.00% |        |        |        |              |
| 52.18%    | UNIVERSITY OF ARIZONA                    | Arizona, University of                                         | RATES | 51.00% | 51.00% | 51.50% | 51.50% | 51.50% | 51.50% | 52.50% | 53.00% | 53.50% | 53.50% | 53.50% | 53.50%       |        |        |        |        |              |
| 45.73%    | UNIVERSITY OF ARKANSAS AT FAYETTEVILLE   | Arkansas, University of                                        | RATES | 42.00% | 44.00% | 44.00% | 44.00% | 44.00% | 46.00% | 46.50% | 47.00% | 47.50% | 49.00% | 49.00% | 49.00%       | 50.00% |        |        |        |              |
| 47.86%    | UNIV OF ARKANSAS FOR MED SCIS            | Arkansas: For Medical Sciences, University of                  | RATES | 45.00% | 45.00% | 47.00% | 47.00% | 47.50% | 49.00% | 49.00% | 49.00% | 49.00% | 49.00% | 49.00% | 50.00%       | 51.00% | 52.00% |        |        |              |
| 56.77%    | BAYLOR COLLEGE OF MEDICINE               | Baylor College of Medicine                                     | RATES | 53.50% | 53.50% | 56.50% | 56.50% | 56.50% | 56.50% | 57.50% | 58.50% | 58.50% | 58.50% | 58.50% | 60.00%       | 60.00% | 60.00% |        |        |              |
| 63.62%    | BOSTON UNIVERSITY MEDICAL CAMPUS         | Boston University                                              | RATES | 62.50% | 62.50% | 62.50% | 63.50% | 63.70% | 63.70% | 63.70% | 63.70% | 64.50% | 64.50% | 65.00% | 65.00%       | 65.00% | 65.00% | 65.00% |        |              |
| 60.68%    | BRANDEIS UNIVERSITY                      | Brandeis University                                            | RATES | 57.00% | 58.00% | 58.00% | 58.00% | 60.00% | 61.00% | 61.50% | 62.50% | 62.50% | 62.50% | 62.50% | 62.50%       | 62.50% |        |        |        |              |
| 62.05%    | BROWN UNIVERSITY                         | Brown University                                               | RATES | 60.00% | 61.50% | 62.00% | 62.00% | 62.00% | 62.50% | 62.50% | 62.50% | 62.50% | 62.50% | 62.50% | 62.50%       | 58.50% | 59.00% | 59.50% |        |              |
| 55.45%    | UNIVERSITY OF CALIFORNIA BERKELEY        | California - Berkeley, University of                           | RATES | 53.00% | 53.50% | 53.50% | 53.50% | 55.50% | 56.50% | 56.50% | 57.00% | 57.00% | 57.00% | 57.00% | 57.00%       | 57.00% | 59.00% | 60.50% |        |              |
| 54.60%    | UNIVERSITY OF CALIFORNIA AT DAVIS        | California - Davis, University of                              | RATES | 52.00% | 53.00% | 53.00% | 53.50% | 54.00% | 54.50% | 55.50% | 56.50% | 57.00% | 57.00% |        | Under Review |        |        |        |        |              |
| 53.82%    | UNIVERSITY OF CALIFORNIA-IRVINE          | California - Irvine, University of                             | RATES | 52.50% | 53.00% | 53.00% | 53.00% | 53.50% | 54.00% | 54.50% | 54.50% | 54.50% | 54.50% | 55.00% | 56.00%       | 57.00% |        |        |        |              |
| 54.27%    | UNIVERSITY OF CALIFORNIA LOS ANGELES     | California - Los Angeles, University of                        | RATES | 54.00% | 54.00% | 54.00% | 54.00% | 54.00% | 54.00% | 54.00% | 54.00% | 54.00% | 54.00% | 55.00% | 56.00%       |        |        |        |        |              |
| 52.91%    | UNIVERSITY OF CALIFORNIA RIVERSIDE       | California - Riverside, University of                          | RATES | 50.50% | 52.00% | 52.00% | 52.00% | 52.00% | 52.00% | 52.00% | 54.00% | 55.00% | 55.00% | 55.50% |              |        |        |        |        |              |
| 55.09%    | UNIVERSITY OF CALIFORNIA SAN DIEGO       | California - San Diego, University of                          | RATES | 54.50% | 54.50% | 54.50% | 54.50% | 55.00% | 55.00% | 55.00% | 55.00% | 55.00% | 56.00% | 57.00% | 57.50%       | 57.50% |        |        | 58.00% |              |
| 56.91%    | UNIVERSITY OF CALIFORNIA, SAN FRANCISCO  | California - San Francisco, University of                      | RATES | 54.50% | 54.50% | 54.50% | 54.50% | 56.50% | 57.00% | 58.00% | 58.50% | 58.50% | 59.50% | 60.00% | 60.50%       | 61.50% |        |        |        |              |
| 52.86%    | UNIVERSITY OF CALIFORNIA SANTA BARBARA   | California - Santa Barbara, University of                      | RATES | 51.50% | 51.50% | 51.50% | 51.50% | 53.00% | 53.00% | 53.50% | 53.50% | 54.00% | 54.00% | 55.00% | 55.00%       |        |        |        |        |              |
| 52.68%    | UNIVERSITY OF CALIFORNIA SANTA CRUZ      | California - Santa Cruz, University of                         | RATES | 51.50% | 51.50% | 51.50% | 51.50% | 52.00% | 53.00% | 53.00% | 53.50% | 54.00% | 54.00% | 54.00% | 54.00%       |        |        |        |        |              |
| 58.09%    | CASE WESTERN RESERVE UNIVERSITY          | Case Western Reserve University                                | RATES | 57.00% | 57.00% | 57.00% | 57.00% | 57.00% | 58.50% | 58.50% | 58.50% | 58.50% | 60.00% | 60.00% | 60.00%       | 61.00% |        |        |        |              |
| 46.00%    | UNIVERSITY OF CENTRAL FLORIDA            | Central Florida, University of                                 | RATES | 44.00% | 45.00% | 45.00% | 45.00% | 45.00% | 46.00% | 46.00% | 46.00% | 46.00% | 49.00% | 49.00% | 49.00%       | 52.00% | 52.00% |        |        |              |
| 58.32%    | UNIVERSITY OF CHICAGO                    | Chicago, University of                                         | RATES | 56.00% | 56.00% | 56.00% | 57.00% | 58.00% | 58.00% | 58.00% | 58.00% | 60.50% | 62.00% | 62.00% | 62.00%       | 64.00% |        |        |        |              |
| 57.83%    | UNIVERSITY OF CINCINNATI                 | Cincinnati, University of                                      | RATES | 56.00% | 57.00% | 57.00% | 57.00% | 57.00% | 58.50% | 58.50% | 58.00% | 58.00% | 59.50% | 59.60% | 60.50%       | 60.50% | 62.00% | 62.00% | 62.00% |              |
| 49.95%    | CLEMSON UNIVERSITY                       | Clemson University                                             | RATES | 48.00% | 48.50% | 48.50% | 48.50% | 49.50% | 50.00% | 50.00% | 52.00% | 52.00% | 52.00% | 52.50% | 52.50%       | 52.50% | 52.50% |        |        |              |
| 52.65%    | UNIVERSITY OF COLORADO                   | Colorado at Boulder, University of                             | RATES | 51.50% | 51.50% | 51.50% | 52.50% | 52.50% | 52.50% | 53.00% | 53.50% | 54.00% | 54.00% |        | Under Review |        |        |        |        |              |
| 54.45%    | UNIVERSITY OF COLORADO DENVER            | Colorado at Denver, University of & Health Science             | RATES | 54.00% | 53.50% | 53.00% | 53.00% | 54.00% | 54.50% | 55.00% | 55.50% | 55.50% | 55.50% | 55.50% | 55.50%       | 55.50% |        |        |        |              |
| 49.13%    | COLORADO STATE UNIVERSITY                | Colorado State University                                      | RATES | 47.00% | 47.00% | 47.50% | 48.00% | 48.50% | 48.70% | 48.70% | 50.00% | 51.00% | 52.00% | 52.00% |              |        |        |        |        | Under Review |
| 60.33%    | COLUMBIA UNIVERSITY HEALTH SCIENCES      | Columbia University                                            | RATES | 60.30% | 60.30% | 61.00% | 60.00% | 60.00% | 60.00% | 60.00% | 60.00% | 60.00% | 60.00% | 62.00% | 62.00%       | 62.00% | 62.50% | 64.50% | 64.50% |              |
| 56.86%    | UNIVERSITY OF CONNECTICUT SCH OF MED/DNT | Connecticut, University of                                     | RATES | 53.00% | 53.00% | 53.00% | 57.00% | 57.00% | 58.00% | 58.00% | 58.00% | 59.50% | 59.50% | 59.50% | 61.00%       | 61.00% | 61.00% |        |        |              |
| 54.82%    | CORNELL UNIVERSITY                       | Cornell University - Contr. Coll.                              | RATES | 54.00% | 54.00% | 54.00% | 54.00% | 54.00% | 55.00% | 55.00% | 55.00% | 55.00% | 56.00% | 57.00% | 57.00%       |        |        |        |        |              |
| 60.55%    | CORNELL UNIVERSITY                       | Cornell University - Endowed                                   | RATES | 59.00% | 59.00% | 59.00% | 59.00% | 60.00% | 60.00% | 61.00% | 61.00% | 61.00% | 63.00% | 64.00% | 64.00%       | 64.00% |        |        |        |              |
| 60.40%    | DARTMOUTH COLLEGE                        | Dartmouth College                                              | RATES | 59.00% | 58.00% | 58.00% | 58.00% | 61.00% | 62.00% | 62.00% | 62.00% | 62.00% | 62.00% |        |              |        |        |        |        |              |
| 56.00%    | UNIVERSITY OF DELAWARE                   | Delaware, University of                                        | RATES |        |        |        |        |        |        |        |        |        |        | 56.00% | 59.50%       | 60.00% | 60.00% | 60.00% | 60.00% |              |
| 55.00%    | DREXEL UNIVERSITY                        | Drexel University                                              | RATES | 52.00% | 53.00% | 54.00% | 54.50% | 54.50% | 54.50% | 56.50% | 56.50% | 56.50% | 56.50% | 56.50% | 56.50%       | 51.00% | 51.50% | 51.50% |        |              |
| 57.64%    | DUKE UNIVERSITY                          | Duke University                                                | RATES | 56.00% | 56.00% | 57.00% | 57.00% | 57.00% | 57.00% | 57.00% | 59.00% | 59.00% | 59.00% | 60.00% | 61.00%       | 61.00% | 61.00% |        |        |              |
| 55.64%    | EMORY UNIVERSITY                         | Emory University                                               | RATES | 55.00% | 55.00% | 55.00% | 55.00% | 56.00% | 56.00% | 56.00% | 56.00% | 56.00% | 56.00% | 56.00% | 56.00%       | 56.00% | 56.00% | 56.50% | 56.50% |              |
| 45.18%    | FLORIDA INTERNATIONAL UNIVERSITY         | Florida International University                               | RATES | 42.00% | 44.00% | 45.00% | 45.00% | 45.00% | 45.00% | 45.00% | 46.50% | 46.50% | 46.50% | 46.50% | 47.50%       | 47.50% |        |        |        |              |
| 50.72%    | UNIVERSITY OF FLORIDA                    | Florida, University of                                         | RATES |        |        | 48.50% | 48.50% | 51.00% | 51.00% | 50.00% | 50.00% | 52.50% | 52.50% | 52.50% | 52.50%       | 52.50% | 52.50% |        |        |              |
| 54.14%    | GEORGE WASHINGTON UNIVERSITY             | George Washington University                                   | RATES | 51.50% | 51.50% | 51.50% | 52.50% | 52.50% | 52.50% | 52.50% | 52.50% | 59.50% | 59.50% | 59.50% | 59.50%       | 61.50% | 61.50% | 61.50% |        | 60.00%       |
| 54.82%    | GEORGETOWN UNIVERSITY                    | Georgetown University                                          | RATES | 53.50% | 53.50% | 53.50% | 55.00% | 55.00% | 55.00% | 55.50% | 55.50% | 55.50% | 55.50% | 55.50% | 55.50%       | 56.00% | 56.00% |        |        |              |
| 48.05%    | GEORGIA STATE UNIVERSITY                 | Georgia State University                                       | RATES | 44.50% | 44.50% | 44.50% | 44.50% | 47.50% | 48.00% | 48.00% | 50.50% | 51.50% | 51.50% | 53.50% | 54.50%       | 55.50% | 56.00% |        |        |              |
| 49.05%    | UNIVERSITY OF GEORGIA                    | Georgia: Research Foundation, University of                    | RATES | 47.50% | 48.50% | 48.50% | 48.50% | 48.50% | 49.00% | 49.00% | 50.00% | 50.00% | 50.00% | 50.00% | 51.00%       | 51.00% | 51.00% | 51.00% | 51.00% | 51.00%       |
| 69.45%    | HARVARD MEDICAL SCHOOL                   | Harvard Medical School                                         | RATES | 69.00% | 69.50% | 69.50% | 69.50% | 69.50% | 69.50% | 69.50% | 69.50% | 69.50% | 69.50% | 69.50% |              |        |        |        |        |              |
| 61.18%    | HARVARD SCHOOL OF PUBLIC HEALTH          | Harvard School of Public Health                                | RATES | 63.50% | 63.50% | 61.50% | 61.50% | 61.50% | 61.50% | 61.50% | 61.50% | 58.50% | 59.00% | 59.50% | 59.50%       | 59.50% |        |        |        |              |
| 68.64%    | HARVARD UNIVERSITY                       | Harvard University                                             | RATES | 67.00% | 68.00% | 68.00% | 69.00% | 69.00% | 69.00% | 69.00% | 69.00% | 69.00% | 69.00% | 69.00% |              |        |        |        |        |              |
| 50.78%    | UNIVERSITY OF HOUSTON                    | Houston, University of                                         | RATES | 50.00% | 50.00% | 50.00% | 50.00% | 50.00% |        |        | 50.50% | 50.50% | 53.00% | 53.00% | 53.00%       | 55.0%  | 55.0%  | 55.0%  |        |              |
| 55.64%    | INDIANA UNIVERSITY BLOOMINGTON           | Indiana University                                             | RATES | 54.00% | 54.00% | 54.00% | 55.00% | 56.00% | 56.00% | 56.00% | 56.00% | 56.00% | 57.50% | 57.50% | 58.50%       | 58.50% | 58.50% | 58.50% |        |              |
| 51.14%    | UNIVERSITY OF IOWA                       | Iowa, University of                                            | RATES | 50.00% | 50.00% | 50.00% | 51.00% | 51.00% | 51.00% | 51.00% | 52.50% | 52.50% | 52.50% | 54.50% | 54.50%       | 54.50% |        |        |        |              |
| 62.70%    | JOHNS HOPKINS UNIVERSITY                 | Johns Hopkins University                                       | RATES | 64.00% | 64.00% | 61.50% | 62.00% | 62.00% | 62.00% | 62.00% | 62.00% | 63.00% | 63.50% | 63.75% | 63.75%       | 63.75% | 63.75% | 63.75% |        |              |
| 49.09%    | UNIV OF ARKANSAS FOR MED SCIS            | Kansas, University of                                          | RATES | 46.00% | 47.00% | 47.00% | 47.00% | 49.00% | 49.50% | 50.00% | 50.00% | 51.50% | 51.50% | 51.50% | 51.50%       | 52.00% | 52.00% |        |        |              |
| 49.86%    | UNIVERSITY OF KENTUCKY                   | Kentucky, University of                                        | RATES | 47.50% | 48.50% | 48.50% | 48.50% | 48.50% | 50.00% | 50.00% | 50.50% | 50.50% | 53.00% | 53.00% | 53.00%       |        |        |        |        |              |
| 48.00%    | LOUISIANA STATE UNIV A&M COL BATON ROUGE | Louisiana State University                                     | RATES | 48.00% | 48.00% | 48.00% | 48.00% | 48.00% | 48.00% | 48.00% | 48.00% | 48.00% | 48.00% | 48.00% | 48.00%       | 48.00% |        |        |        |              |
| 44.41%    |                                          | Louisiana State University Health Sciences Center, New Orleans | RATES | 42.00% | 42.00% | 42.00% | 44.00% | 44.00% | 45.50% | 46.00% | 46.00% | 45.00% | 46.00% | 46.00% | 46.00%       | 46.00% |        |        |        |              |
| 51.00%    | UNIVERSITY OF LOUISVILLE                 | Louisville, University of: Research Foundation                 | RATES | 48.00% | 49.00% | 49.00% | 50.00% | 50.00% | 50.00% | 50.00% | 54.00% | 54.00% | 54.00% | 56.00% | 56.00%       | 56.00% | 56.00% | 56.00% | 56.50% |              |
| 49.94%    |                                          | Maryland - Baltimore County, University of                     | RATES | 48.00% | 48.00% | 48.00% | 48.00% | 50.00% |        |        | 50.50% | 52.00% | 52.50% | 52.50% | 53.00%       |        |        |        |        |              |
| 51.68%    | UNIV OF MARYLAND, COLLEGE PARK           | Maryland - College Park, University of                         | RATES | 50.00% | 50.00% | 50.00% | 52.00% | 52.00% | 52.00% | 52.00% | 52.00% | 52.00% | 52.00% | 54.50% | 54.50%       | 54.50% |        |        |        |              |
| 52.83%    | UNIVERSITY OF MARYLAND BALTIMORE         | Maryland, Baltimore, University of                             | RATES |        |        |        |        |        | 50.00% | 50.00% | 54.00% | 54.00% | 54.50% | 54.50% | 54.50%       | 54.50% | 54.50% |        |        |              |
